# Supplementary material for: Lifelong cortical myelin plasticity and age-related degeneration in the live mammalian brain
Source: Springer Nature journal article supplement (doi:10.1038/s41593-018-0120-6), 2018-03-19
Supplement: 41593_2018_120_MOESM3_ESM.pdf [file 41593_2018_120_MOESM3_ESM.pdf]

**Supplementary Table 1: Descriptive statistics for all data.**

| Figure Number | Statistical Test                                             | Sample Size | Sample Definition  | P Value          | Degrees of Freedom and F/T/z/R/ETC value |        |
|---------------|--------------------------------------------------------------|-------------|--------------------|------------------|------------------------------------------|--------|
|               |                                                              |             |                    |                  | DF                                       | q      |
| 2c            | one-way ANOVA with Tukey correction for multiple comparisons | 4,4,4,4,4,3 | mice per age group | adjusted P Value | DF                                       | q      |
|               |                                                              |             |                    | 0.0238           | 16                                       | 5.1    |
|               |                                                              |             |                    | 0.0006           | 16                                       | 7.728  |
|               |                                                              |             |                    | <0.0001          | 16                                       | 10.88  |
|               |                                                              |             |                    | <0.0001          | 16                                       | 17.46  |
|               |                                                              |             |                    | <0.0001          | 16                                       | 9.38   |
|               |                                                              |             |                    | 0.3228           | 16                                       | 3.007  |
|               |                                                              |             |                    | 0.0092           | 16                                       | 5.785  |
|               |                                                              |             |                    | <0.0001          | 16                                       | 12.36  |
|               |                                                              |             |                    | 0.0436           | 16                                       | 4.659  |
|               |                                                              |             |                    | 0.5737           | 16                                       | 2.349  |
|               |                                                              |             |                    | 0.0002           | 16                                       | 8.439  |
|               |                                                              |             |                    | 0.8774           | 16                                       | 1.545  |
|               |                                                              |             |                    | 0.003            | 16                                       | 6.578  |
|               |                                                              |             |                    | 0.9957           | 16                                       | 0.6974 |
|               |                                                              |             |                    | 0.0022           | 16                                       | 6.787  |
|               |                                                              |             |                    |                  |                                          |        |
|               |                                                              |             |                    |                  |                                          |        |
| 2d            | one-way ANOVA with Tukey correction for multiple comparisons | 4,4,4,4,4,3 | mice per age group | Adjusted P Value | DF                                       | q      |
|               |                                                              |             |                    | 0.0363           | 16                                       | 4.794  |
|               |                                                              |             |                    | 0.0011           | 16                                       | 7.325  |
|               |                                                              |             |                    | <0.0001          | 16                                       | 11.1   |
|               |                                                              |             |                    | <0.0001          | 16                                       | 16.34  |
|               |                                                              |             |                    | <0.0001          | 16                                       | 9.131  |
|               |                                                              |             |                    | 0.3632           | 16                                       | 2.887  |
|               |                                                              |             |                    | 0.0044           | 16                                       | 6.306  |
|               |                                                              |             |                    | <0.0001          | 16                                       | 11.54  |
|               |                                                              |             |                    | 0.0416           | 16                                       | 4.693  |
|               |                                                              |             |                    | 0.3411           | 16                                       | 2.951  |
|               |                                                              |             |                    | 0.0006           | 16                                       | 7.8    |
|               |                                                              |             |                    | 0.8331           | 16                                       | 1.69   |
|               |                                                              |             |                    | 0.0197           | 16                                       | 5.237  |
|               |                                                              |             |                    | 0.9615           | 16                                       | 1.145  |
|               |                                                              |             |                    | 0.0068           | 16                                       | 5.994  |
|               |                                                              |             |                    |                  |                                          |        |
|               |                                                              |             |                    |                  |                                          |        |

| 2e | one-way ANOVA with Tukey correction for multiple comparisons | 4,4,3,4,4,3 | mice per age group | Adjusted P Value | DF | q      |
|----|--------------------------------------------------------------|-------------|--------------------|------------------|----|--------|
|    |                                                              |             |                    | 0.0008           | 17 | 7.439  |
|    |                                                              |             |                    | <0.0001          | 17 | 10.54  |
|    |                                                              |             |                    | <0.0001          | 17 | 15.85  |
|    |                                                              |             |                    | <0.0001          | 17 | 12.53  |
|    |                                                              |             |                    | 0.0001           | 17 | 8.881  |
|    |                                                              |             |                    | 0.1764           | 17 | 3.546  |
|    |                                                              |             |                    | 0.0004           | 17 | 7.983  |
|    |                                                              |             |                    | 0.0325           | 17 | 4.834  |
|    |                                                              |             |                    | 0.7350           | 17 | 1.959  |
|    |                                                              |             |                    | 0.1224           | 17 | 3.845  |
|    |                                                              |             |                    | 0.9844           | 17 | 0.9297 |
|    |                                                              |             |                    | 0.8942           | 17 | 1.485  |
|    |                                                              |             |                    | 0.2762           | 17 | 3.149  |
|    |                                                              |             |                    | 0.0139           | 17 | 5.432  |
|    |                                                              |             |                    | 0.5029           | 17 | 2.517  |
|    |                                                              |             |                    |                  |    |        |
|    |                                                              |             |                    |                  |    |        |
| 2h | one-way ANOVA with Tukey correction for multiple comparisons | 4,4,4,4,4,4 | mice per age group | Adjusted P Value | DF | q      |
|    |                                                              |             |                    | 0.0358           | 18 | 4.73   |
|    |                                                              |             |                    | 0.0002           | 18 | 8.248  |
|    |                                                              |             |                    | <0.0001          | 18 | 19.77  |
|    |                                                              |             |                    | <0.0001          | 18 | 16.98  |
|    |                                                              |             |                    | 0.0014           | 18 | 6.915  |
|    |                                                              |             |                    | 0.1796           | 18 | 3.518  |
|    |                                                              |             |                    | <0.0001          | 18 | 15.04  |
|    |                                                              |             |                    | <0.0001          | 18 | 12.25  |
|    |                                                              |             |                    | 0.6416           | 18 | 2.185  |
|    |                                                              |             |                    | <0.0001          | 18 | 11.53  |
|    |                                                              |             |                    | 0.0001           | 18 | 8.73   |
|    |                                                              |             |                    | 0.9299           | 18 | 1.333  |
|    |                                                              |             |                    | 0.3917           | 18 | 2.796  |
|    |                                                              |             |                    | <0.0001          | 18 | 12.86  |
|    |                                                              |             |                    | <0.0001          | 18 | 10.06  |
|    |                                                              |             |                    |                  |    |        |
|    |                                                              |             |                    |                  |    |        |
| 2i | one-way ANOVA with Tukey correction for multiple comparisons | 4,4,4,4,4,4 | mice per age group | Adjusted P Value | DF | q      |
|    |                                                              |             |                    | 0.0717           | 18 | 4.233  |
|    |                                                              |             |                    | 0.0036           | 18 | 6.294  |
|    |                                                              |             |                    | <0.0001          | 18 | 10.91  |
|    |                                                              |             |                    | <0.0001          | 18 | 12.96  |
|    |                                                              |             |                    | 0.1593           | 18 | 3.617  |

|    |                                                              |                |                                                                                                                                          |                  |     |         |
|----|--------------------------------------------------------------|----------------|------------------------------------------------------------------------------------------------------------------------------------------|------------------|-----|---------|
|    |                                                              |                |                                                                                                                                          | 0.6936           | 18  | 2.061   |
|    |                                                              |                |                                                                                                                                          | 0.0020           | 18  | 6.677   |
|    |                                                              |                |                                                                                                                                          | 0.0001           | 18  | 8.726   |
|    |                                                              |                |                                                                                                                                          | 0.9977           | 18  | 0.6159  |
|    |                                                              |                |                                                                                                                                          | 0.0422           | 18  | 4.616   |
|    |                                                              |                |                                                                                                                                          | 0.0020           | 18  | 6.665   |
|    |                                                              |                |                                                                                                                                          | 0.4371           | 18  | 2.677   |
|    |                                                              |                |                                                                                                                                          | 0.6984           | 18  | 2.049   |
|    |                                                              |                |                                                                                                                                          | 0.0008           | 18  | 7.293   |
|    |                                                              |                |                                                                                                                                          | <0.0001          | 18  | 9.342   |
|    |                                                              |                |                                                                                                                                          |                  |     |         |
|    |                                                              |                |                                                                                                                                          |                  |     |         |
| 2j | one-way ANOVA with Tukey correction for multiple comparisons | 4,4,4,4,4,4    | mice per age group                                                                                                                       | Adjusted P Value | DF  | q       |
|    |                                                              |                |                                                                                                                                          | 0.0049           | 18  | 6.08    |
|    |                                                              |                |                                                                                                                                          | <0.0001          | 18  | 10.08   |
|    |                                                              |                |                                                                                                                                          | <0.0001          | 18  | 20.14   |
|    |                                                              |                |                                                                                                                                          | <0.0001          | 18  | 20.08   |
|    |                                                              |                |                                                                                                                                          | <0.0001          | 18  | 13.75   |
|    |                                                              |                |                                                                                                                                          | 0.0980           | 18  | 3.999   |
|    |                                                              |                |                                                                                                                                          | <0.0001          | 18  | 14.07   |
|    |                                                              |                |                                                                                                                                          | <0.0001          | 18  | 14      |
|    |                                                              |                |                                                                                                                                          | 0.0005           | 18  | 7.671   |
|    |                                                              |                |                                                                                                                                          | <0.0001          | 18  | 10.07   |
|    |                                                              |                |                                                                                                                                          | <0.0001          | 18  | 10.01   |
|    |                                                              |                |                                                                                                                                          | 0.1488           | 18  | 3.672   |
|    |                                                              |                |                                                                                                                                          | >0.9999          | 18  | 0.06032 |
|    |                                                              |                |                                                                                                                                          | 0.0031           | 18  | 6.394   |
|    |                                                              |                |                                                                                                                                          | 0.0033           | 18  | 6.334   |
|    |                                                              |                |                                                                                                                                          |                  |     |         |
|    |                                                              |                |                                                                                                                                          |                  |     |         |
|    |                                                              |                |                                                                                                                                          |                  |     |         |
| 5d | one-way ANOVA with Tukey correction for multiple comparisons | 23,72,57,62,62 | P30=23 axons from 4 mice, P60=72 axons from 4 mice, P220= 57 axons from 3 mice, P370=62 axons from 4 mice, and P640=62 axons from 4 mice | Adjusted P Value | DF  | q       |
|    |                                                              |                |                                                                                                                                          | 0.7251           | 271 | 1.76    |
|    |                                                              |                |                                                                                                                                          | 0.0048           | 271 | 4.955   |
|    |                                                              |                |                                                                                                                                          | <0.0001          | 271 | 6.703   |
|    |                                                              |                |                                                                                                                                          | <0.0001          | 271 | 10.61   |
|    |                                                              |                |                                                                                                                                          | 0.0132           | 271 | 4.525   |

|    |                                                              |         |                                                           |                  |                   |       |
|----|--------------------------------------------------------------|---------|-----------------------------------------------------------|------------------|-------------------|-------|
|    |                                                              |         |                                                           | <0.0001          | 271               | 7.012 |
|    |                                                              |         |                                                           | <0.0001          | 271               | 12.52 |
|    |                                                              |         |                                                           | 0.5052           | 271               | 2.248 |
|    |                                                              |         |                                                           | <0.0001          | 271               | 7.45  |
|    |                                                              |         |                                                           | 0.0019           | 271               | 5.314 |
|    |                                                              |         |                                                           |                  |                   |       |
| 7d | one-way ANOVA with Tukey correction for multiple comparisons | 4,4,4,3 | mice per age group                                        | Adjusted P Value |                   |       |
|    |                                                              |         |                                                           | Spheroids        | DF                | q     |
|    |                                                              |         |                                                           | 0.4072           | 11                | 2.291 |
|    |                                                              |         |                                                           | <0.0001          | 11                | 18.9  |
|    |                                                              |         |                                                           | <0.0001          | 11                | 25.22 |
|    |                                                              |         |                                                           | <0.0001          | 11                | 16.61 |
|    |                                                              |         |                                                           | <0.0001          | 11                | 23.1  |
|    |                                                              |         |                                                           | 0.001            | 11                | 7.72  |
|    |                                                              |         |                                                           |                  |                   |       |
|    |                                                              |         |                                                           | Debris           | DF                | q     |
|    |                                                              |         |                                                           | 0.7535           | 11                | 1.412 |
|    |                                                              |         |                                                           | 0.0033           | 11                | 6.589 |
|    |                                                              |         |                                                           | <0.0001          | 11                | 11.62 |
|    |                                                              |         |                                                           | 0.0168           | 11                | 5.177 |
|    |                                                              |         |                                                           | <0.0001          | 11                | 10.31 |
|    |                                                              |         |                                                           | 0.0113           | 11                | 5.519 |
|    |                                                              |         |                                                           |                  |                   |       |
|    |                                                              |         |                                                           |                  |                   |       |
| 8c | unpaired two-tailed student's t-test                         | 67,102  | myelin debris, oligodendrocyte soma from 3 mice           | P Value          |                   |       |
|    |                                                              |         |                                                           | <0.0001          | t=15.91<br>df=167 |       |
|    |                                                              |         |                                                           |                  |                   |       |
| 8d | unpaired two-tailed student's t-test                         | 103,136 | myelin spheroids, normal appearing internodes from 3 mice | P Value          |                   |       |
|    |                                                              |         |                                                           | 0.2482           | t=1.158<br>df=237 |       |
|    |                                                              |         |                                                           |                  |                   |       |
|    |                                                              |         |                                                           |                  |                   |       |
